# Supplementary material for: Oenological Processes and Product Qualities in the Elaboration of Sparkling Wines Determine the Biogenic Amine Content
Source: MDPI journal article supplement (doi:10.3390/fermentation7030144), 2021-08-04
Supplement: s1 [file s1]

Oenological Processes and Product Qualities in the Elaboration of Sparkling Wines  
Determine the Biogenic Amine Content

Aina Mir-Cerdà<sup>1</sup>, Anaïs Izquierdo-Llopart<sup>1</sup>, Javier Saurina<sup>1\*</sup> and Sonia Sentellas<sup>1,2</sup>

1 Department of Chemical Engineering and Analytical Chemistry. University of Barcelona

2 Serra Húnter Lecturer, Generalitat de Barcelona, Spain

\* Correspondence: xavi.saurina@ub.edu (JS)

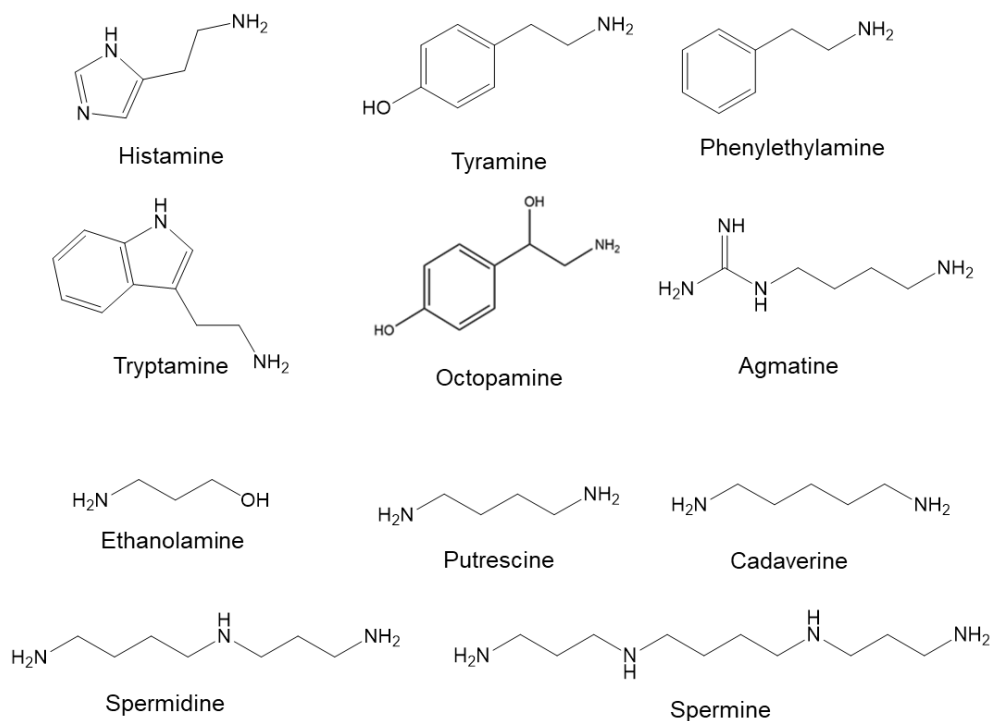

Figure S1. Structures of the most common biogenic amines in fermented foodstuffs.

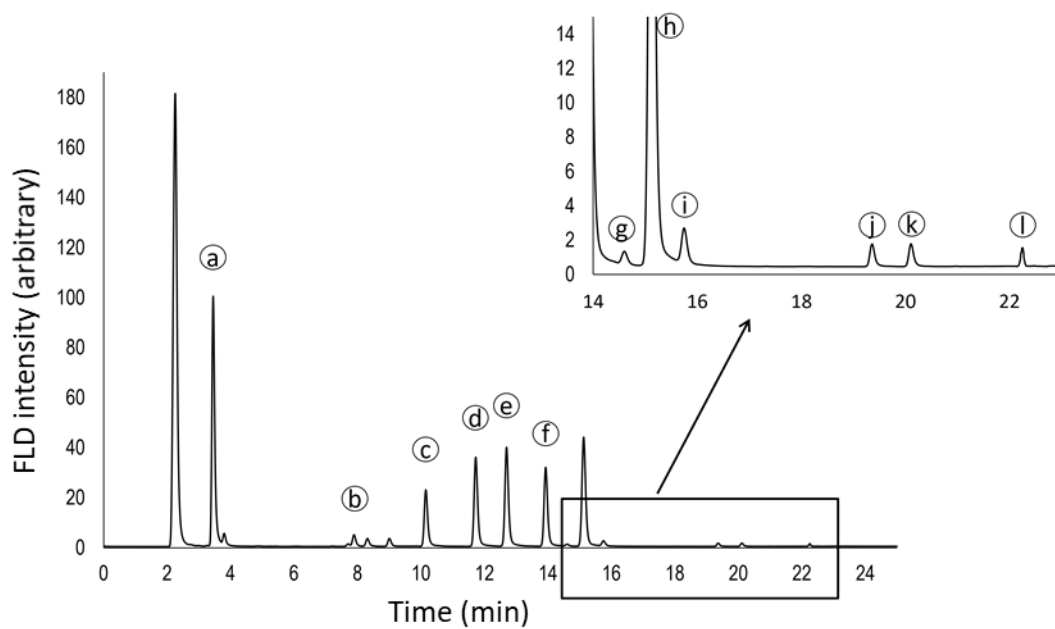

Figure S2. FLD chromatograms of a derivatized standard solution of BAs at 2 mg L<sup>-1</sup> each. Peak assignment: (a) ethanolamine; (b) agmatine; (c) tryptamine; (d) phenylethylamine; (e) putrescine; (f) cadaverine; (g) histamine; (h) hexylamine (IS); (i) octopamine; (j) tyramine; (k) spermidine; (l) spermine.

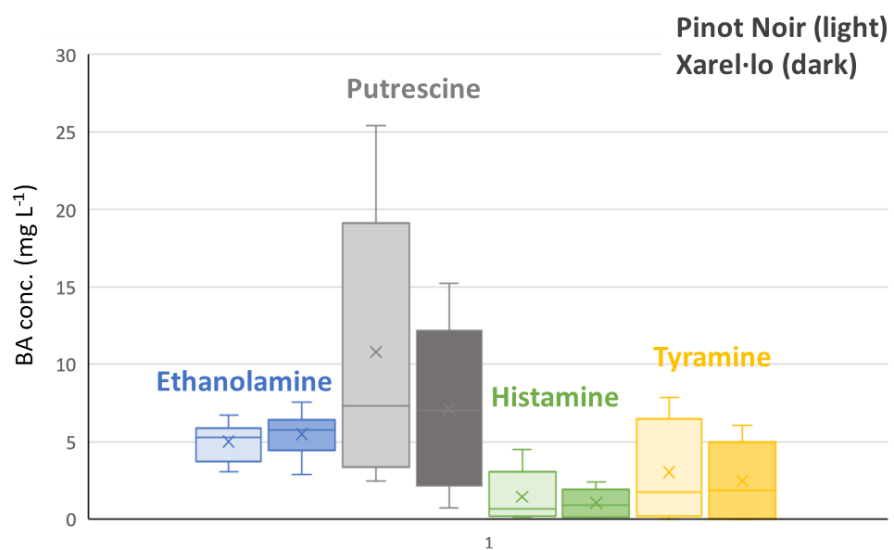

Figure S3. Boxplots with whiskers representing the concentration of ethanolamine, putrescine, histamine and tyramine in base and stabilized wines for Pinot Noir (light color) and Xarel·lo (dark color) varieties.

Table S1. MRM transitions for the detection of dansyl derivatives of biogenic amines by LC-MS/MS.

| <b>Biogenic amine</b> | <b>Retention time (min)</b> | <b>Dansyl groups</b> | <b>Parent ion (m/z)</b> | <b>Product ion (m/z)</b> | <b>DP (V)</b> | <b>CE (V)</b> | <b>CXP (V)</b> |
|-----------------------|-----------------------------|----------------------|-------------------------|--------------------------|---------------|---------------|----------------|
| Ethanolamine          | 3.5                         | 1                    | 295.0                   | 170.0                    | 120           | 60            | 12             |
| Agmatine              | 7.9                         | 2                    | 597.3                   | 170.1                    | 50            | 80            | 8              |
| Tryptamine            | 10.2                        | 1                    | 394.2                   | 234.1                    | 60            | 40            | 10             |
| Phenylalanine         | 11.7                        | 1                    | 355.3                   | 170.1                    | 90            | 30            | 10             |
| Putrescine            | 12.7                        | 2                    | 555.3                   | 234.0                    | 120           | 60            | 12             |
| Cadaverine            | 13.9                        | 2                    | 569.2                   | 234.0                    | 110           | 50            | 8              |
| Histamine             | 14.6                        | 2                    | 578.3                   | 234.0                    | 80            | 40            | 12             |
| Hexylamine (IS)       | 15.1                        | 1                    | 335.4                   | 157.0                    | 86            | 39            | 12             |
| Octopamine            | 15.7                        | 2                    | 620.2                   | 170.0                    | 66            | 59            | 12             |
| Tyramine              | 19.4                        | 2                    | 604.3                   | 234.2                    | 90            | 40            | 8              |
| Spermidine            | 20.1                        | 3                    | 845.4                   | 360.3                    | 40            | 80            | 12             |
| Spermine              | 22.4                        | 4                    | 1135.6                  | 360.4                    | 90            | 50            | 10             |

DP, declustering potential; CE, collision energy; CXP, cell exit potential; IS, internal standard.

Table S2. Concentration (mg L<sup>-1</sup>) of biogenic amines in the different type of samples

|             | Eth | Agm   | Tryp | Phe   | Put | Cad  | His  | Oct | Tyr   | Smd  | Spm |
|-------------|-----|-------|------|-------|-----|------|------|-----|-------|------|-----|
| <b>MPA</b>  | 3.0 | 0.16  | ND   | 0.064 | 2.5 | 0.29 | 0.16 | ND  | ND    | 0.30 | 1.4 |
| <b>BWPA</b> | 3.1 | 0.15  | ND   | 0.020 | 4.0 | 0.30 | 0.19 | ND  | 0.017 | 0.20 | 1.4 |
| <b>SWPA</b> | 3.4 | 0.18  | ND   | 0.026 | 3.8 | 0.31 | 0.20 | ND  | 0.054 | 0.36 | 1.4 |
| <b>C3PA</b> | 2.9 | 0.16  | ND   | 0.028 | 2.1 | 0.30 | 0.18 | ND  | 0.22  | 0.11 | 1.4 |
| <b>C7PA</b> | 2.7 | 0.11  | ND   | 0.015 | 1.4 | 0.28 | 0.14 | ND  | 0.17  | ND   | 1.4 |
| <b>MPB</b>  | 2.7 | 0.13  | ND   | 0.039 | 1.4 | 0.29 | 0.14 | ND  | 0.033 | 0.24 | 1.4 |
| <b>BWPB</b> | 5.2 | 0.15  | ND   | 0.035 | 3.4 | 0.39 | 0.18 | ND  | 0.38  | 0.10 | 1.5 |
| <b>SWPB</b> | 5.5 | 0.14  | ND   | 0.032 | 2.8 | 0.33 | 0.31 | ND  | 0.31  | 0.36 | 1.5 |
| <b>C3PB</b> | 6.1 | 0.13  | ND   | 0.031 | 2.7 | 0.32 | 0.30 | ND  | 0.32  | 0.22 | 1.5 |
| <b>C7PB</b> | 5.5 | 0.13  | ND   | 0.026 | 2.3 | 0.32 | 0.26 | ND  | 0.27  | 0.10 | 1.5 |
| <b>MPC</b>  | 3.9 | 0.14  | ND   | 0.028 | 4.8 | 0.30 | 0.17 | ND  | 0.014 | 0.40 | 1.4 |
| <b>BWPC</b> | 5.4 | 0.18  | ND   | 0.29  | 24  | 0.48 | 4.0  | ND  | 5.6   | 0.33 | 1.6 |
| <b>SWPC</b> | 4.8 | 0.15  | ND   | 0.16  | 11  | 0.39 | 1.2  | ND  | 3.3   | ND   | 1.4 |
| <b>C3PC</b> | 4.9 | 0.17  | ND   | 0.17  | 12  | 0.41 | 1.4  | ND  | 3.5   | 0.19 | 1.5 |
| <b>C7PC</b> | 5.0 | 0.15  | ND   | 0.17  | 11  | 0.40 | 1.4  | ND  | 3.5   | 0.10 | 1.5 |
| <b>MPD</b>  | 3.5 | 0.11  | ND   | 0.055 | 2.1 | 0.29 | 0.13 | ND  | ND    | 0.10 | 1.4 |
| <b>BWPD</b> | 6.1 | 0.183 | ND   | 0.47  | 21  | 0.67 | 3.7  | ND  | 7.7   | 0.40 | 1.5 |
| <b>SWPD</b> | 6.6 | 0.18  | ND   | 0.44  | 16  | 0.52 | 1.8  | ND  | 7.0   | 0.38 | 1.5 |
| <b>C3PD</b> | 6.4 | 0.17  | ND   | 0.40  | 16  | 0.50 | 2.3  | ND  | 6.7   | 0.20 | 1.5 |
| <b>C7PD</b> | 6.7 | 0.18  | ND   | 0.43  | 18  | 0.55 | 2.9  | ND  | 7.2   | 0.22 | 1.5 |

Table S2. Cont.

|                | Eth     | Agm       | Tryp | Phe     | Put     | Cad       | His      | Oct | Tyr    | Smd     | Spm     |
|----------------|---------|-----------|------|---------|---------|-----------|----------|-----|--------|---------|---------|
| <b>MXA</b>     | 2.7     | 0.11      | ND   | ND      | 1.3     | 0.28      | 0.11     | ND  | ND     | 0.11    | 1.4     |
| <b>BWXA</b>    | 3.9     | 0.12      | ND   | ND      | 1.8     | 0.28      | 0.11     | ND  | 0.015  | 0.20    | 1.4     |
| <b>SWXA</b>    | 3.2     | 0.11      | ND   | ND      | 0.95    | 0.28      | 0.11     | ND  | 0.023  | ND      | 1.4     |
| <b>C3XA</b>    | 3.4     | 0.11      | ND   | ND      | 1.1     | 0.28      | 0.13     | ND  | 0.16   | ND      | 1.4     |
| <b>C7XA</b>    | 3.4     | 0.11      | ND   | ND      | 0.94    | 0.28      | 0.12     | ND  | 0.16   | ND      | 1.4     |
| <b>MXB</b>     | 4.0     | 0.10      | ND   | ND      | 0.43    | 0.27      | 0.10     | ND  | ND     | 0.29    | 1.4     |
| <b>BWXB</b>    | 5.1     | 0.12      | ND   | ND      | 3.1     | 0.28      | 0.11     | ND  | 0.015  | 0.11    | 1.4     |
| <b>SWXB</b>    | 6.3     | 0.12      | ND   | 0.016   | 2.4     | 0.28      | 0.21     | ND  | 0.35   | 0.25    | 1.4     |
| <b>C3XB</b>    | 7.1     | 0.16      | ND   | 0.031   | 3.1     | 0.31      | 0.26     | ND  | 0.55   | 0.23    | 1.5     |
| <b>C7XB</b>    | 5.6     | 0.14      | ND   | 0.020   | 3.1     | 0.30      | 0.26     | ND  | 0.52   | 0.10    | 1.4     |
| <b>MXC</b>     | 5.3     | 0.11      | ND   | ND      | 3.3     | 0.28      | 0.11     | ND  | 0.0024 | 0.33    | 1.4     |
| <b>BWXC</b>    | 5.7     | 0.14      | ND   | 0.38    | 11      | 0.65      | 1.8      | ND  | 4.6    | 0.59    | 1.4     |
| <b>SWXC</b>    | 5.9     | 0.14      | ND   | 0.34    | 14      | 0.62      | 2.3      | ND  | 5.2    | 0.43    | 1.4     |
| <b>C3XC</b>    | 7.3     | 0.15      | ND   | 0.35    | 18      | 0.72      | 2.6      | ND  | 5.6    | 0.41    | 1.4     |
| <b>C7XC</b>    | 5.9     | 0.15      | ND   | 0.25    | 11      | 0.63      | 1.9      | ND  | 5.4    | 0.49    | 1.4     |
| <b>MXD</b>     | 4.1     | 0.13      | ND   | ND      | 2.8     | 0.28      | 0.12     | ND  | 0.016  | 0.37    | 1.4     |
| <b>BWXD</b>    | 6.5     | 0.14      | ND   | 0.26    | 13      | 0.36      | 1.9      | ND  | 3.5    | 0.23    | 1.4     |
| <b>SWXD</b>    | 7.1     | 0.14      | ND   | 0.28    | 10.3    | 0.55      | 1.8      | ND  | 5.9    | 0.25    | 1.4     |
| <b>C3XD</b>    | 6.1     | 0.15      | ND   | 0.25    | 9.5     | 0.59      | 1.7      | ND  | 5.4    | 0.31    | 1.4     |
| <b>C7XD</b>    | 6.1     | 0.14      | ND   | 0.33    | 19      | 0.76      | 2.8      | ND  | 5.4    | 0.40    | 1.4     |
| <b>Average</b> | 5.0     | 0.14      | -    | 0.14    | 7.3     | 0.40      | 0.99     | -   | 2.2    | 0.24    | 1.4     |
| <b>SD</b>      | 1.4     | 0.02      | -    | 0.16    | 6.7     | 0.15      | 1.1      | -   | 2.7    | 0.15    | 0.05    |
| <b>min-max</b> | 2.7-7.3 | 0.10-0.18 | -    | ND-0.47 | 0.43-24 | 0.27-0.76 | 0.10-4.0 | -   | ND-7.7 | ND-0.59 | 1.4-1.6 |

ND: not detected

Amine identification: Agm: agmatine; Tryp: tryptamine; Phe: phenylethylamine; Put: putrescine; Cad: cadaverine; His: histamine; Oct: octopamine; Tyr: tyramine; Smd: spermidine; Spm: spermine; Eth: ethanolamine.

Table S3. ANOVA applied to the study of quality and MLF factors.

|            |                         | P-value             |                     |                      |                      |                      |                      |                      |                     |       |
|------------|-------------------------|---------------------|---------------------|----------------------|----------------------|----------------------|----------------------|----------------------|---------------------|-------|
|            |                         | Eth                 | Agm                 | Phe                  | Put                  | Cad                  | His                  | Tyr                  | Smd                 | Spm   |
| Pinot Noir | Pre-fermentation (must) | $3.1 \cdot 10^{-5}$ | >0.05               | >0.05                | >0.05                | >0.05                | >0.05                | >0.05                | >0.05               | >0.05 |
|            | Post-fermentation       | $1.2 \cdot 10^{-4}$ | $8.6 \cdot 10^{-4}$ | $2.5 \cdot 10^{-13}$ | $8.0 \cdot 10^{-24}$ | $1.8 \cdot 10^{-11}$ | $1.9 \cdot 10^{-20}$ | $1.1 \cdot 10^{-17}$ | >0.05               | >0.05 |
| Xarel·lo   | Pre-fermentation (must) | >0.05               | >0.05               | >0.05                | $1.8 \cdot 10^{-4}$  | >0.05                | >0.05                | >0.05                | >0.05               | >0.05 |
|            | Post-fermentation       | $2.4 \cdot 10^{-5}$ | $7.8 \cdot 10^{-4}$ | $3.6 \cdot 10^{-27}$ | $1.4 \cdot 10^{-17}$ | $1.6 \cdot 10^{-16}$ | $5.5 \cdot 10^{-23}$ | $8.5 \cdot 10^{-39}$ | $2.2 \cdot 10^{-5}$ | >0.05 |

Amine identification: Eth: ethanolamine; Agm: agmatine; Phe: phenylethylamine; Put: putrescine; Cad: cadaverine; His: histamine; Tyr: tyramine; Smd: spermidine; Spm: spermine.
